# Supplementary material for: Neoadjuvant chemotherapy-induced decrease of prognostic nutrition index predicts poor prognosis in patients with breast cancer
Source: Springer Nature journal article supplement (doi:10.1186/s12885-020-6647-4), 2020-02-27
Supplement: MOESM4 [file 17748528]

# Disease-free survival

## Pre-NAC Alb

- High pre-NAC Alb (n=180)
- Low pre-NAC Alb (n=11)

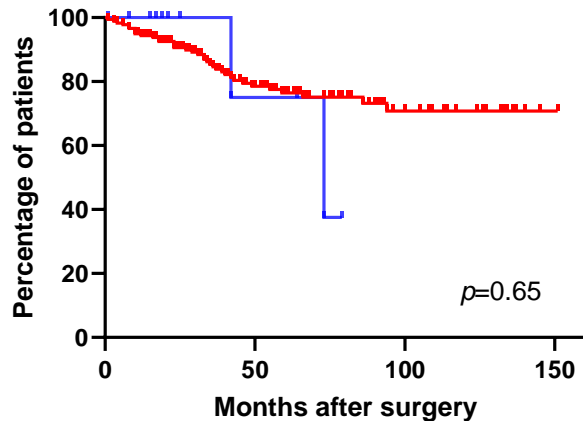

HR:0.72 (95%CI:0.13-3.76)

## Pre-NAC NLR

- High pre-NAC NLR (n=90)
- Low pre-NAC NLR (n=101)

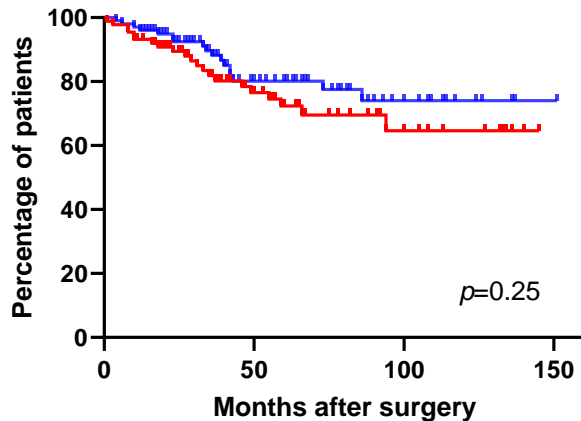

HR:1.44 (95%CI:0.76-2.73)

## Pre-NAC BMI

- High pre-NAC BMI (n=100)
- Low pre-NAC BMI (n=91)

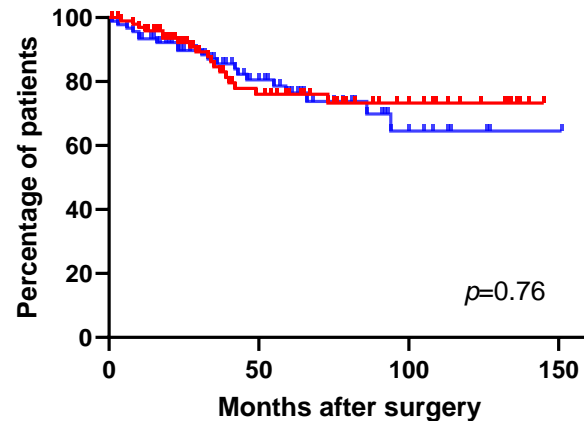

HR:0.90 (95%CI:0.48-1.71)
