# Supplementary material for: Neoadjuvant chemotherapy-induced decrease of prognostic nutrition index predicts poor prognosis in patients with breast cancer
Source: Springer Nature journal article supplement (doi:10.1186/s12885-020-6647-4), 2020-02-27
Supplement: MOESM7 [file 17748528]

# Disease-specific survival

**$\Delta$ PNI**

— High  $\Delta$ PNI (n=100)

— Low  $\Delta$ PNI (n=91)

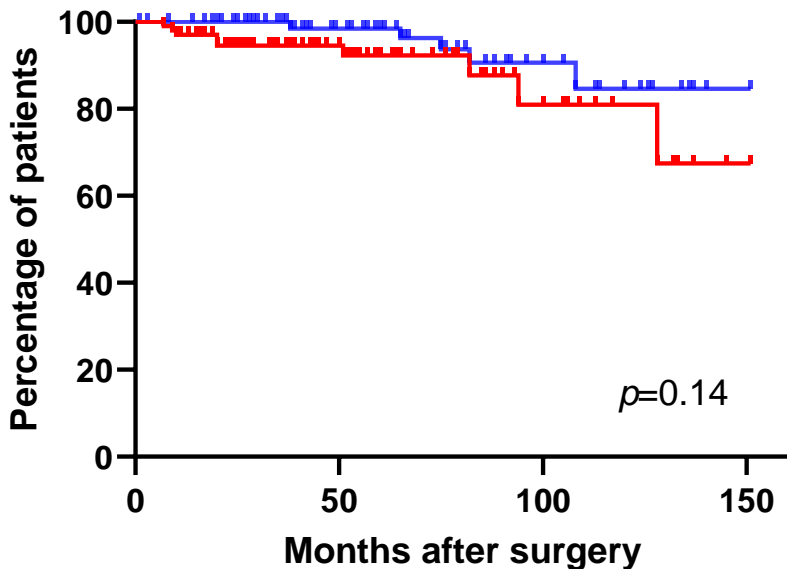

$p=0.14$

HR:2.20 (95%CI:0.77-6.39)
