# Supplementary material for: Neoadjuvant chemotherapy-induced decrease of prognostic nutrition index predicts poor prognosis in patients with breast cancer
Source: Springer Nature journal article supplement (doi:10.1186/s12885-020-6647-4), 2020-02-27

- AC (n=11)
- AC→PTX (n=91)
- AC→DOC (n=89)

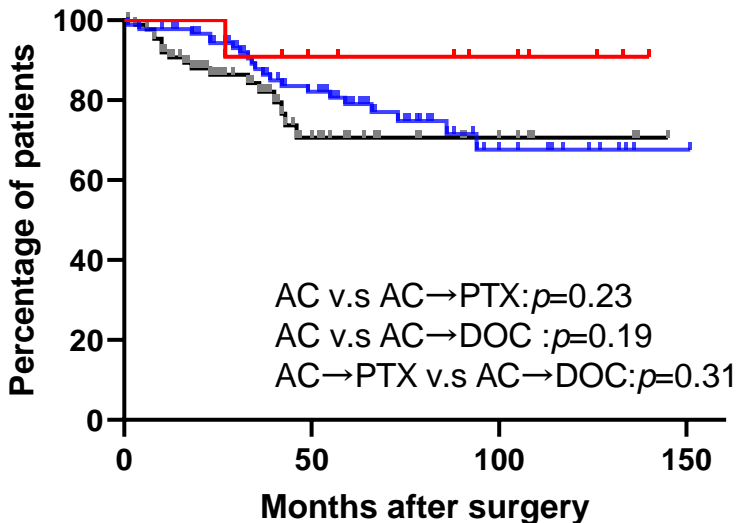

Supplement: MOESM11 [file 17748528]
