# Supplementary material for: Neoadjuvant chemotherapy-induced decrease of prognostic nutrition index predicts poor prognosis in patients with breast cancer
Source: Springer Nature journal article supplement (doi:10.1186/s12885-020-6647-4), 2020-02-27
Supplement: MOESM13 [file 17748528]

### Luminal

- High  $\Delta$ PNI (n=56)
- Low  $\Delta$ PNI (n=51)

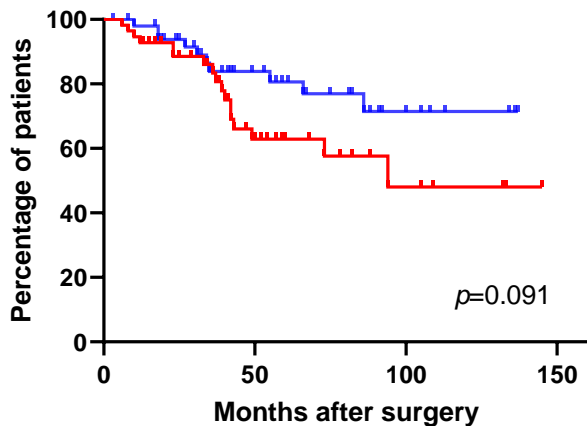

HR:1.98 (95%CI:0.90-4.10)

### Luminal HER2

- High  $\Delta$ PNI (n=18)
- Low  $\Delta$ PNI (n=19)

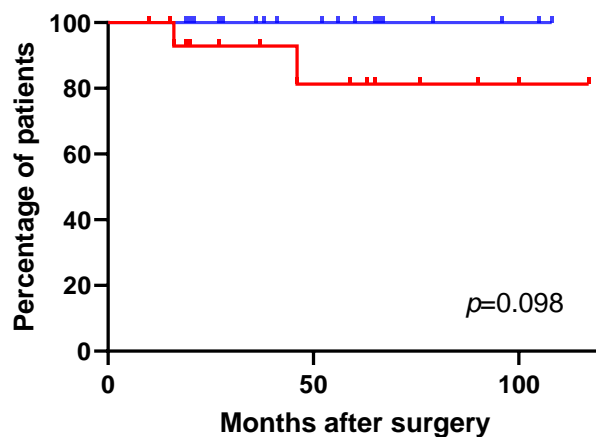

### HER2 enriched

- High  $\Delta$ PNI (n=12)
- Low  $\Delta$ PNI (n=12)

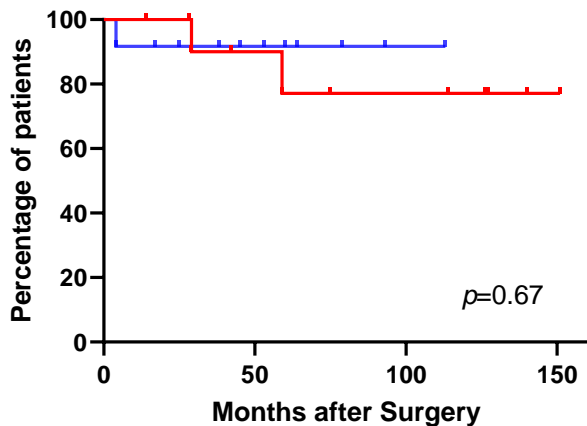

HR:1.66 (95%CI:0.17-16.31)

### TNBC

- High  $\Delta$ PNI (n=14)
- Low  $\Delta$ PNI (n=9)

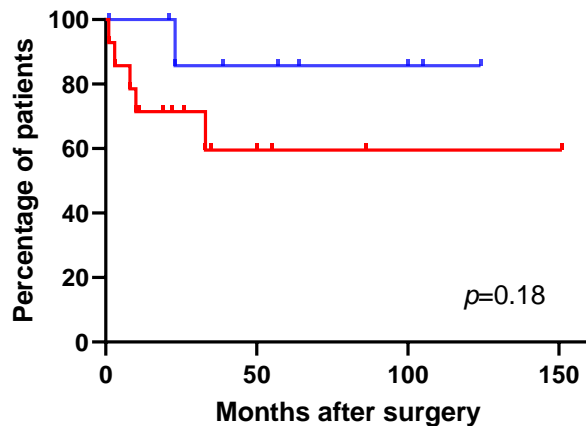

HR:3.80 (95%CI:0.75-19.14)
