# Supplementary material for: Neoadjuvant chemotherapy-induced decrease of prognostic nutrition index predicts poor prognosis in patients with breast cancer
Source: Springer Nature journal article supplement (doi:10.1186/s12885-020-6647-4), 2020-02-27
Supplement: MOESM14 [file 17748528]

**stagel,II**

High  $\Delta$ PNI (n=66)  
 Low  $\Delta$ PNI (n=53)

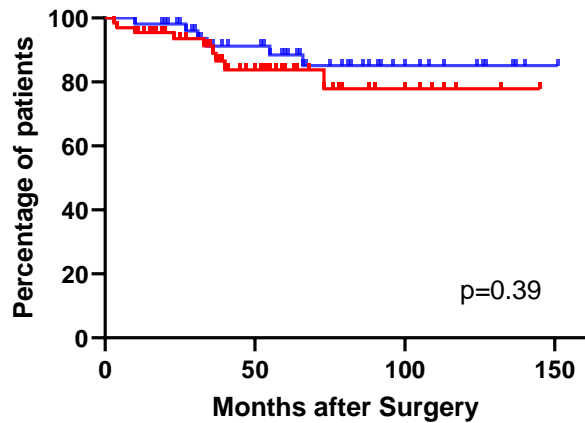

HR 0.64, 95%CI(0.23-1.71)

**stagelIII**

High  $\Delta$ PNI (n=34)  
 Low  $\Delta$ PNI (n=38)

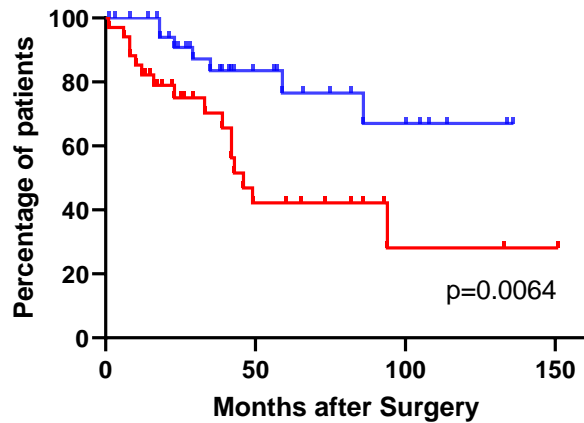

HR 0.31, 95%CI(0.13-0.71)

**HG1**

High  $\Delta$ PNI (n=36)  
 Low  $\Delta$ PNI (n=18)

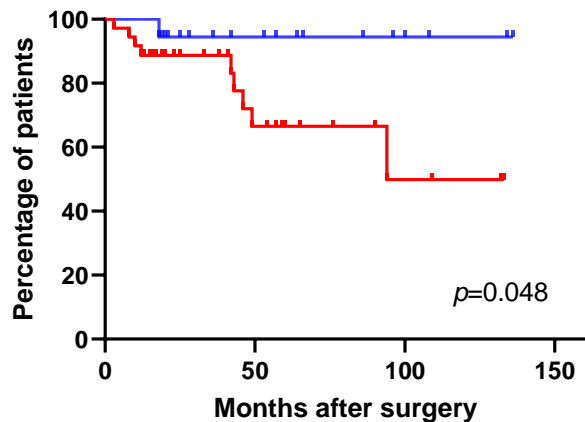

HR:6.10 (95%CI:1.72-21.5)

**HG2**

High  $\Delta$ PNI (n=42)  
 Low  $\Delta$ PNI (n=47)

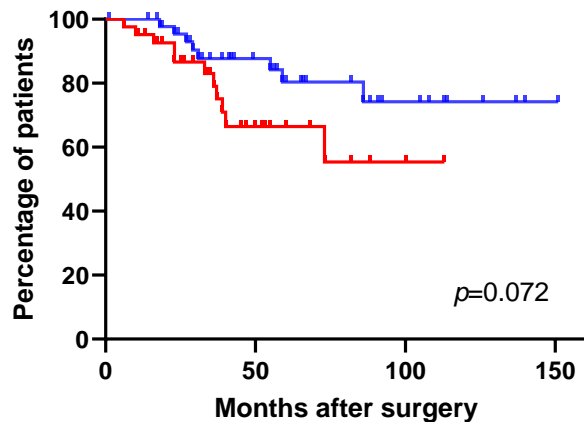

HR:2.22 (95%CI:0.88-5.62)

**HG3**

High  $\Delta$ PNI (n=9)  
 Low  $\Delta$ PNI (n=14)

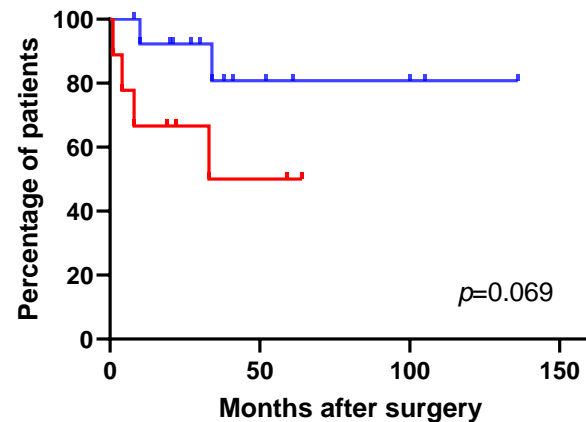

HR:4.19 (95%CI:0.75-23.2)
